# Supplementary material
Source: ML conference proceedings conference paper supplement (https://openreview.net/forum?id=Jdj0fZhswJC)
Supplement: supplementary_material [file attachment]

## SUPPLEMENTARY MATERIAL

# CONVERGENCE IS NOT ENOUGH: AVERAGE-CASE PERFORMANCE OF NO-REGRET LEARNING DYNAMICS

### A MISSING PROOFS AND MATERIALS: SECTION 3

A finite potential game,  $\Gamma$ , defined as in section 2, is called *perfectly-regular* if all its restrictions are regular, i.e., if all its restrictions have only regular Nash equilibria (cf. Definition 3.1). We will write  $R_\Gamma$  to denote the set of all restrictions of  $\Gamma$  as defined in section 2. We start by showing that the class of perfectly-regular potential games (PRPG) is well-defined, since restrictions of potential games are also potential games. Let us also recall the formal definition of regular Nash equilibria:

**Definition 2.1** (Regular Nash equilibria (Harsanyi, 1973; Swenson et al., 2020)). *A Nash equilibrium,  $x^* \in NE(\Gamma)$ , is called regular if it is (i) quasi-strict, i.e., if for each player  $k \in \mathcal{N}$ ,  $x_k^*$  assigns positive probability to all best responses of player  $k$  against  $x_{-k}^*$ , and (ii) second-order non-degenerate, i.e., if the Hessian,  $H(x^*)$ , taken with respect to  $\text{supp}(x^*)$  is non-singular.*

**Lemma A.1.** *A restriction of a potential game is also a potential game.*

*Proof.* Let  $\Gamma'$  a restriction of a potential game  $\Gamma$  and potential function  $\Phi : \mathcal{A} \rightarrow \mathbb{R}$ . Take  $\Phi' : \mathcal{A}' \rightarrow \mathbb{R}$  to be the restriction of  $\Phi$  to  $\mathcal{A}' \subseteq \mathcal{A}$ . Then for all  $k \in \mathcal{N}$ , and  $s, s' \in \mathcal{A}'$  we have that:

$$u'_k(s) - u'_k(s'_k, s_{-k}) = u_k(s) - u_k(s'_k, s_{-k}) = \Phi(s) - \Phi(s'_k, s_{-k}) = \Phi'(s) - \Phi'(s'_k, s_{-k}),$$

where the second equality follows from the definition of potential games (cf. section 2). Hence,  $\Phi'$  is a potential function, and therefore  $\Gamma'$  a potential game.  $\square$

Using the recent results of Swenson et al. (2020), it is not difficult to show that perfectly-regular potential games are generic, and have a finite number of restricted equilibria. These are the statements of Lemma A.2 and Lemma A.3, respectively.

**Lemma A.2.** *Almost all finite potential games are perfectly-regular.*

*Proof.* Let RPG, and PRPG denote the sets of regular potential, and perfectly-regular potential games, respectively. Let also  $\Gamma$  be a random finite potential game. Since  $\Gamma$  is finite, there exist  $2^m$  distinct restrictions of  $\Gamma$ , where  $m := \sum_{k \in \mathcal{N}} |\mathcal{A}_k|$ . Then, by Lemma A.1, we have that any restriction  $\Gamma'$  of  $\Gamma$  is also a random finite potential game, and therefore  $\Pr(\Gamma' \in \text{RPG}) = 1$ , with respect to the Lebesgue measure Swenson et al. (2020). It follows that:

$$\begin{aligned} \Pr(\Gamma \in \text{PRPG}) &= 1 - \Pr(\Gamma \notin \text{PRPG}) \\ &= 1 - \Pr\left(\bigcup_{\Gamma' \in R_\Gamma} \Gamma' \notin \text{RPG}\right) \\ &\geq 1 - \sum_{\Gamma' \in R_\Gamma} \Pr(\Gamma' \notin \text{RPG}) \\ &= 1, \end{aligned}$$

where the last equality follows from the fact that  $|R_\Gamma|$  is finite.  $\square$

**Lemma A.3.** *Every perfectly-regular finite potential game has a finite number of restricted equilibria.*

*Proof.* Let  $\Gamma$  be a perfectly-regular finite potential game, and let  $\Gamma'$  be one of its restrictions. By the definition of a perfectly-regular potential game, we have that  $\Gamma'$  is a regular potential game. Furthermore, since  $\Gamma$  is finite and  $\mathcal{A}'_k \subseteq \mathcal{A}_k$  for all  $k \in \mathcal{N}$ , it follows that  $\Gamma'$  is finite. But then  $\Gamma'$  is a finite regular potential game and as such it has a finite number of Nash equilibria, i.e.,  $NE(\Gamma') < \infty$

Swenson et al. (2020). Finally, since each restricted equilibrium is a Nash equilibrium of a restrictions of  $\Gamma$ , it follows that there exist at most:

$$\sum_{\Gamma' \in R_\Gamma} |\text{NE}(\Gamma')| \leq 2^m \max_{\Gamma' \in R_\Gamma} |\text{NE}(\Gamma')| < \infty$$

restricted equilibria of  $\Gamma$ . Therefore, the number of restricted equilibria of  $\Gamma$  is finite.  $\square$

We, now, consider the  $q$ -replicator dynamics of a finite potential game  $\Gamma$ , given by the dynamical system of equations in equation QRD:

$$\dot{x}_{ka_k} = x_{ka_k}^q \left( u_k(a_k, x_{-k}) - \frac{\sum_{a_j \in \mathcal{A}_k} x_{ka_j}^q u_k(a_j, x_{-k})}{\sum_{a_j \in \mathcal{A}_k} x_{ka_j}^q} \right), \quad \text{for all } k \in \mathcal{N}, a_k \in \mathcal{A}_k$$

Our goal for the remainder of this section is to prove that for any interior initial condition  $x(0) \in \mathcal{X}$  the dynamics in equation QRD converge pointwise to a Nash equilibrium of a given perfectly-regular finite potential game.<sup>5</sup> The proof proceeds in two parts: First, we prove that the dynamics converge to a restricted equilibrium of the game for any initial condition. Second, we prove that for any *interior* initial condition, the dynamics are bound to deviate from any rest-point that is not a Nash equilibrium, and therefore, they have to converge to a Nash equilibrium.

Let us begin by proving the first of the two claims. Recall that the  $\omega$ -limit set of a sequence  $(x(t))_{t \geq 0} \subseteq \mathcal{X}$ , that is generated by the QRD, is defined as:

$$\omega(x(t)) := \bigcap_{t \geq 0} \text{cl}\{x(t') \mid t' > t\}$$

where  $\text{cl } S$  denotes the closure of a set  $S$ .

**Lemma A.4.** *Given a perfectly-regular finite potential game  $\Gamma$ , every  $\omega$ -limit set, with respect to the  $q$ -replicator dynamics, is a singleton  $\{x^*\}$ , where  $x^* \in \mathcal{X}$  is a rest-point of the dynamics. Specifically,  $x^*$  is a Nash equilibrium, if  $q = 0$ , or a restricted equilibrium, if  $q > 0$ . Furthermore, the set  $\mathcal{Q}(\mathcal{X}) := \bigcup_{x_0 \in \mathcal{X}} \{x^* \in \mathcal{X} \mid \lim_{t \rightarrow \infty} x(t) = x^*, x(0) = x_0\}$ , i.e., the set of all limit points, is finite.*

*Proof.* Let  $\Gamma$  be a perfectly-regular finite potential game. Since  $\Gamma$  is a potential game, by the result of Mertikopoulos & Sandholm (2018), we have that every  $\omega$ -limit set consists entirely of rest-points of the dynamics. In particular, these are Nash equilibria of  $\Gamma$ , if  $q = 0$ , or restricted equilibria of  $\Gamma$ , if  $q > 0$ . However, since  $\Gamma$  is perfectly-regular—it suffices for it to be regular for the case of  $q = 0$ —it follows by Lemma A.3 that every  $\omega$ -limit set is a finite set. Consider now, the  $\omega$ -limit set of an orbit  $(x(t))_{t \geq 0}$  of the dynamics for some arbitrary initial condition  $x(0) = x_0$ . Since  $x(t)$  is continuous, the  $\omega$  limit set  $\omega(x(t))$  is the decreasing intersection of compact, connected sets and, therefore, it is connected. Since the  $\omega$ -limit set is finite, the above implies that, in fact it has to be a singleton  $\{x^*\}$ , where  $x^*$  is a Nash equilibrium if  $q = 0$  Mertikopoulos & Sandholm (2018), or a restricted equilibrium if  $q > 0$ , respectively. Finally, from the above, we have that the set of all limit points,  $\mathcal{Q}(\mathcal{X})$  is a subset of the restricted equilibria of  $\Gamma$ ; therefore, since  $\Gamma$  is a perfectly-regular finite potential game, we have, by Lemma A.3, that the set of restricted equilibria of  $\Gamma$  and, consequently,  $\mathcal{Q}(\mathcal{X})$  are finite.  $\square$

To prove Theorem 3.2 (restated bellow, for completeness), it suffices to exclude convergence to restricted equilibria that are not NE of the original game,  $\Gamma$ . To establish that, we will show that as the QRD approach a limit point  $x_k^*$ , the probability  $x_{ka_k}$  of non-optimally performing actions must go to zero. Thus, all actions in  $\text{supp } x_k^*$  must be a best response against  $x_{-k}^*$  for all agents  $k \in \mathcal{N}$  which implies that  $x_k^*$  is a NE of  $\Gamma$ .

**Theorem 3.2** (pointwise convergence of QRD to NE in PRPGs). *Given any perfectly-regular potential game (PRPG),  $\Gamma$ , and any interior initial condition  $x(0) \in \text{int } \mathcal{X}$ , the  $q$ -replicator dynamics, defined as in equation QRD, converge pointwise to a Nash equilibrium  $x^*$  of  $\Gamma$  for any parameter  $q \geq 0$ . Furthermore, the set  $\mathcal{Q}(\text{int } \mathcal{X}) := \bigcup_{x_0 \in \text{int } \mathcal{X}} \{x^* \in \mathcal{X} \mid \lim_{t \rightarrow \infty} x(t) = x^*, x(0) = x_0\}$ , i.e., the set of all limit points of interior initial conditions, is finite.*

<sup>5</sup>Recall that the *interior* of the set  $\mathcal{X}$ ,  $\text{int } \mathcal{X}$  is the set of all joint choice distributions  $x \in \mathcal{X}$  with full support, i.e.,  $x_{ka_k} > 0$  for all  $a_k \in \mathcal{A}_k$  and for all  $k \in \mathcal{N}$ ; all points of  $\mathcal{X}$  that are not in the interior, are called *boundary points*.

*Proof.* If  $q = 0$ , the statement follows directly from Lemma A.4. So we only need to consider the  $q$ -Replicator Dynamics for  $q > 0$ . Let  $\Gamma$  be a perfectly-regular finite potential game, and let  $(x(t))_{t \geq 0}$  be a trajectory of the  $q$ -replicator dynamics with initial condition  $x(0) = x_0 \in \text{int } \mathcal{X}$ . Since  $q > 0$ , we know that the support of  $x(t)$  remains constant for all  $t \in \mathbb{R}$  Mertikopoulos & Sandholm (2018). Thus, since  $x(0) \in \text{int } \mathcal{X}$ , it follows that  $x(t)$  remains in the interior of  $\mathcal{X}$  for all  $t \geq 0$ , i.e.,  $x_{ka_k}(t) > 0$  for all  $k \in \mathcal{N}$  and for all  $a_k \in \mathcal{A}_k$ . Furthermore, by Lemma A.4, we have that the limit  $\lim_{t \rightarrow \infty} x(t)$  exists and is a rest-point of the dynamics, say  $x^*$ .

Assume that  $x^*$  is not a Nash equilibrium, i.e., that  $x^*$  fails to satisfy equation 1. That implies that there exists a player  $k \in \mathcal{N}$  and an action  $a_k \in \mathcal{A}_k$  with  $x_{ka_k}^* = 0$ , i.e.,  $a_k$  is not in the support of  $x_k^*$ , but it satisfies  $u_k(a_k, x_{-k}^*) > u_k(x^*)$ . Note, that since  $\dot{x}_{ka_k}^* = 0$  for all  $a_k \in \mathcal{A}_k$ , we know from equation QRD that:

$$u_k(a_k, x_{-k}^*) = \frac{\sum_{a_j \in \mathcal{A}_k} (x_{ka_j}^*)^q u_k(a_j, x_{-k}^*)}{\sum_{a_j \in \mathcal{A}_k} (x_{ka_j}^*)^q}, \quad (7)$$

for all  $a_k \in \text{supp}(x_k^*)$ , and thus:

$$u_k(a_k, x_{-k}^*) > u_k(x^*) = \sum_{a_j \in \mathcal{A}_k} x_{ka_j}^* u_k(a_j, x_{-k}^*) = \frac{\sum_{a_j \in \mathcal{A}_k} (x_{ka_j}^*)^q u_k(a_j, x_{-k}^*)}{\sum_{a_j \in \mathcal{A}_k} (x_{ka_j}^*)^q}, \quad (8)$$

where the last equality follows directly from equation 7 and the fact that  $x_k^*$  is in the simplex, i.e.,  $\sum_{a_k \in \mathcal{A}_k} x_{ka_k}^* = 1$ . Fix  $\epsilon > 0$ , and consider the set:

$$B_\epsilon := \left\{ x \in \mathcal{X} \mid u_k(a_k, x_{-k}) > \frac{\sum_{a_j \in \mathcal{A}_k} x_{ka_j}^q u_k(a_j, x_{-k})}{\sum_{a_j \in \mathcal{A}_k} x_{ka_j}^q} + \epsilon \right\}.$$

By continuity,  $B_\epsilon$  is *open* and by equation 8, it contains  $x^*$ —given  $\epsilon$  small enough. Since  $x(t)$  converges to  $x^*$  as  $t \rightarrow \infty$ , there exists a time  $t_\epsilon \geq 0$  such that  $x(t) \in B_\epsilon$  for all  $t > t_\epsilon$ . Therefore, for each  $t > t_\epsilon$  we have that:

$$\dot{x}_{ka_k}(t) = (x_{ka_k}(t))^q \left( u_k(a_k, x_{-k}) - \frac{\sum_{a_j \in \mathcal{A}_k} (x_{ka_j}(t))^q u_k(a_j, x_{-k})}{\sum_{a_j \in \mathcal{A}_k} (x_{ka_j}(t))^q} \right) > \epsilon (x_{ka_k}(t))^q > 0,$$

where the last inequality follows because  $x(t) \in \text{int } \mathcal{X}$  for all  $t \geq 0$ . Finally, by integrating with respect to time, we have that for all  $t > t_\epsilon$ :

$$x_{ka_k}(t) = \int_{t'=t_\epsilon}^t \dot{x}_{ka_k}(t') dt + x_{ka_k}(t_\epsilon) > x_{ka_k}(t_\epsilon) > 0.$$

Therefore, by the continuity of  $x(t)$ , we have that:

$$x_{ka_k}^* = \lim_{t \rightarrow \infty} x_{ka_k}(t) \geq x_{ka_k}(t_\epsilon) > 0,$$

which is a contradiction to our assumption that  $x_{ka_k}^* = 0$ , which is a direct consequence of  $x^*$  *not* being a NE of the game; thus,  $x^*$  has to be a Nash equilibrium of  $\Gamma$ .  $\square$

## B ADDITIONAL VISUALIZATIONS AND MISSING PROOFS: SECTION 4

### B.1 VISUALIZATIONS: INVARIANT FUNCTIONS AND SEPARATING MANIFOLDS

In this part, we provide systematic, and essentially exhaustive, visualizations of the stable manifolds (separatrices) in the  $\Gamma_{w,\beta}$  class.

**Different payoff- and risk-dominant NE in  $\Gamma_{w,\beta}$ .** The main differences in the class  $\Gamma_{w,\beta}$  occur between games in which the payoff- and risk-dominant equilibria coincide and games in which they differ. Recall that Figure 2 shows the invariant function in a  $\Gamma_{w,\beta}$  instance, where  $w = 2$  and  $\beta = 0$ , i.e., in which the payoff- and risk- dominant equilibria coincide. In Figure 6, we provide an instance in which the payoff- and risk-dominant equilibria differ. Similar to Figure 3, Figure 7 depicts the separating manifolds (stable manifolds or separatrices) of the regions of attractions of the two pure

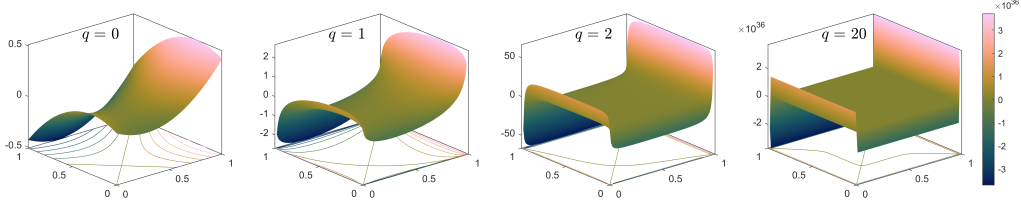

Figure 6: The invariant function,  $\Psi_q(x, y)$ , for all  $x, y \in [0, 1]^2$  in the game  $\Gamma_{w,\beta}$  for  $w = 2, \beta = -4$ , and the same values of  $q$  as in Figure 2:  $q = 0$  (gradient descent dynamics),  $q = 1$  (standard replicator dynamics),  $q = 2$  (log-barrier dynamics), and  $q = 20$ . The invariant function again becomes very steep at the boundary as  $q$  increases, taking both arbitrarily large negative (**dark**) and positive (**light**) values in the vicinity of the NE.

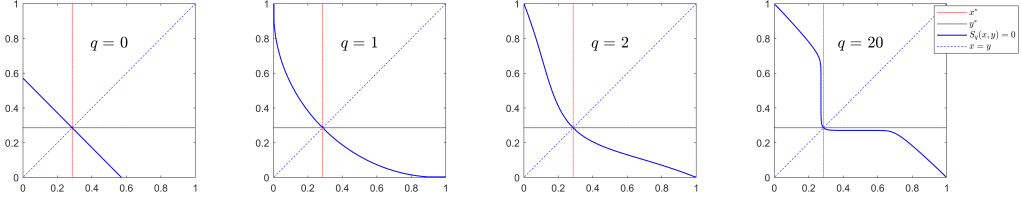

Figure 7: The stable manifolds,  $\Psi_{q,\text{Stable}}(x, y) = 0$ , (**solid blue** lines) for the same values of  $q$  and instance of  $\Gamma_{w,\beta}$  as in Figure 6, in which the payoff-dominant NE is at the bottom-left corner and the risk-dominant NE is at the upper-right corner. For all  $q$ , the separatrix goes through the mixed NE at the intersection of the  $x^*$  (**dashed red**) and  $y^*$  (dashed black) coordinates. All panels also include the unstable manifold defined by  $x - y = 0$  (**dashed blue** line). The region of attraction of the payoff-dominant NE is now smaller for all  $q$ , because this NE is not risk-dominant, cf. Theorem 4.4.

NE. These are precisely the zero-level sets of the invariant functions shown in Figure 6. As we can see, in this case, the region of attraction of the payoff-dominant equilibrium,  $w$  is smaller than the region of the, now, risk-dominant equilibrium, 1. Intuitively, when a NE becomes risk-dominated, its region of attraction shrinks, even if this NE is payoff-dominant. This is because, for a mixed choice of distributions, the risk-dominant NE yields a higher utility and is that more “attractive” for the dynamics. This trade-off between high reward at a certain state (e.g.,  $w, w$ ) and high risk if that state is not reached (e.g.,  $\beta, 0$ , with  $\beta < 0$ ), also explains why socially optimal, but otherwise risky, outcomes, e.g., the adoption of revolutionizing technology or a social norm that challenges the status quo, are never reached in real-life situations.

**Stable manifolds for all  $q \geq 0$ .** In a similar vein to Figure 4, we next depict the separatrices, stacked for all values of  $q \in [0, 10]$ , for different parameterizations of the  $\Gamma_{w,\beta}$  class (Figure 8). In all panels of Figure 8, parameter  $w$  is equal to 2. We obtain qualitatively equivalent plots for any  $w > 1$  and  $\beta$  small enough. The main takeaways from the (essentially exhaustive) visualizations in the panels of Figure 8 are that (i) the region of attraction of the risk-dominant equilibrium is larger for all  $q \geq 0$  regardless of whether this equilibrium is payoff-dominant or not, (ii) the region of attraction of the payoff-dominant equilibrium may become arbitrarily small as this equilibrium becomes arbitrarily risky. In particular, observation (ii), suggests that in this case, it is hopeless to bound any static or average performance measure. This became more transparent with the APoA analysis in the previous Section of the Appendix (cf. Theorem 4.6 in the main paper). We conclude this part with some visualizations of the stable and unstable manifolds in a  $2 \times 2$  non-symmetric PRPG.

**Non-symmetric PRPGs.** Consider the identical-interest PRPG,  $\text{ID}_{w,\beta}$ , with identical payoff functions  $u_{w,\beta,1}(s_1, s_2) = u_{w,\beta,2}(s_1, s_2) = A_{w,\beta,s_1,s_2}$ , where the payoff matrix  $A_{w,\beta} \in \mathbb{R}^{2 \times 2}$  is given by:

$$A_{w,\beta} = \begin{pmatrix} 1 & 0 \\ \beta & w \end{pmatrix}, \quad \beta \leq 1 \leq w.$$

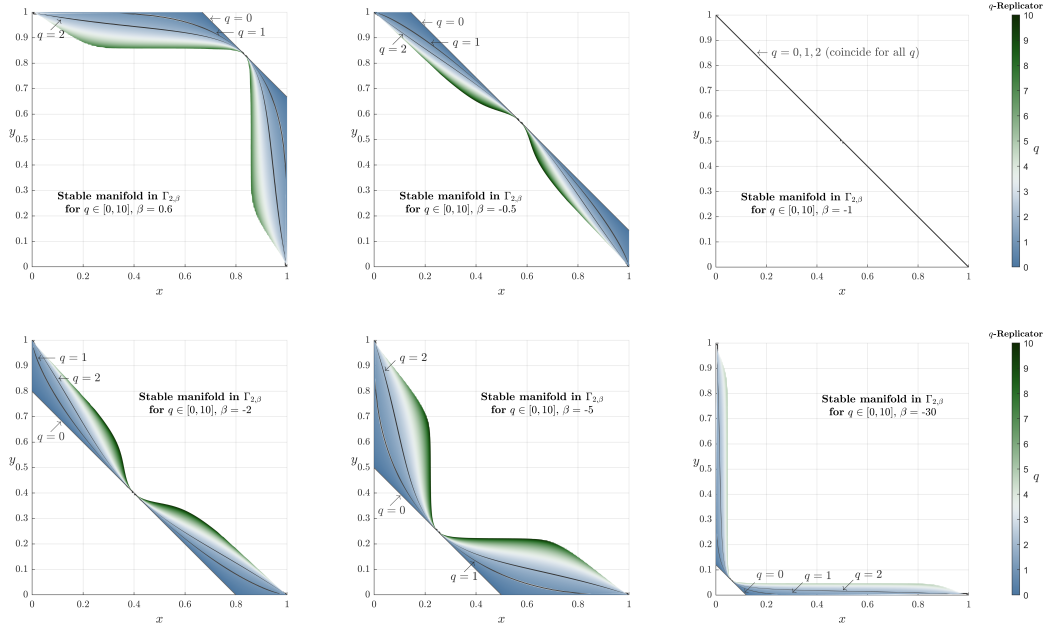

Figure 8: Stable manifolds (separatrices) for all different values of  $q \in [0, 10]$  (from blue to brown) in different parameterizations of the  $\Gamma_{w,\beta}$  game for  $w = 2$  and varying  $\beta$ . In all panels, the manifolds for  $q = 0$ ,  $q = 1$ , and  $q = 2$  are shown in shades of black for reference. The region of attraction of the payoff-dominant equilibrium (bottom-left corner) shrinks as  $q$  increases when this equilibrium is also risk-dominant ( $\alpha > 0.5$ ) and increases with  $q$  when this equilibrium is *not* risk-dominant ( $\alpha < 0.5$ ). In fact, as  $\beta$  decreases, the payoff-dominant becomes increasingly more “risky” and its region of attraction becomes arbitrarily small.

The game  $ID_{w,\beta}$  has the same pure NE as the games  $\Gamma_{w,\beta}$ , namely  $x = y = 0$ , with payoff  $w$ , and  $x = y = 1$ , with payoffs 1 for both players, but now the mixed NE is not symmetric and it is given by:

$$x^* = \frac{w - \beta}{w + 1 - \beta} \quad \text{and} \quad y^* = \frac{w}{w + 1 - \beta}.$$

In Figure 9, we visualize the stable *and* unstable manifolds (unlike the panels in Figure 8, where we only visualized the stable manifolds, since in that case, the unstable manifolds were always equal to the diagonal,  $x = y$ ) for all values of  $q \in [0, 10]$  in an instance of  $ID_{w,\beta}$  with  $w = 2$  and  $\beta = -2$ . In this case, the separating (stable) manifolds do not increase (decrease) monotonically with  $q$  as it is evident from the overlapping (equally) colored regions. Thus, one will require a different approach to estimate whether the size of the regions of attraction of the payoff-dominant equilibrium follow a certain monotonicity pattern, which again may change depending on whether this equilibrium is also risk-dominant or not. In the context of the current paper, Figure 9 highlights that (i) the geometry of the regions of attraction is highly complex under different algorithms (parametrizations of QRD) even for low-dimensional, identical interest games, and (ii) given this complexity, the findings in the class  $\Gamma_{w,\beta}$  become even more surprising and intriguing. Extending the current analysis to further classes of games and developing potentially novel tools to address the geometry of these classes constitute straightforward, yet far-reaching, directions for future research.

## B.2 MISSING MATERIALS AND PROOFS

We begin this section by showing that any  $2 \times 2$  symmetric PRPGs is equivalent to a game  $\Gamma_{w,\beta}$  as defined in subsection 4.2. The only non-generic games we are going to exclude from the reformulation are games that are *dominance-solvable*, and therefore, their analysis is trivial and outside our scope. Recall that  $\Gamma_{w,\beta}$  is a  $2 \times 2$  symmetric PRPG with payoff functions  $u_{w,\beta,1}(s_1, s_2) = u_{w,\beta,2}(s_2, s_1) = A_{w,\beta,1,s_2}$ , where the payoff matrix  $A_{w,\beta} \in \mathbb{R}^{2 \times 2}$  is given by:

$$A_{w,\beta} = \begin{pmatrix} 1 & 0 \\ \beta & w \end{pmatrix}, \quad \beta \leq 1 \leq w.$$

For this part, it is also instructive to consult Pangallo et al. (2022), which provides a taxonomy of  $2 \times 2$  games. Consider an arbitrary  $2 \times 2$  symmetric PRPG with payoff with payoff functions  $u_1(s_1, s_2) = u_2(s_2, s_1) = B_{s_1, s_2}$ , where the payoff matrix  $B \in \mathbb{R}^{2 \times 2}$  is given by:

$$B = \begin{pmatrix} a & c \\ b & d \end{pmatrix}, \quad (9)$$

and set without any loss of the generality  $d \geq a \geq b$ —that may always be done by possibly re-indexing the agents' actions. If  $c > d$ , then the game is dominance-solvable (cf. Table 1 of Pangallo et al. (2022)) and as such the dynamics of the game are trivial. Hence, we may narrow our scope to payoff matrices that satisfy  $d \geq c$ . By our assumption that the game is a PRPG, and hence there it contains a finite number of Nash equilibria, we may exclude games where the above inequalities are *not strict*. All in all, we are going to assume without any loss of the generality that the following conditions hold:

$$d > a > b \quad \text{and} \quad d > c. \quad (10)$$

Let also  $(x, 1 - x)$  and  $(y, 1 - y)$  with  $x, y \in [0, 1]$  denote the choice distributions of the two agents, adopting the common notation for the statespace of game dynamics in  $2 \times 2$  games. Thus, by slightly abusing notation, the choice distributions can be conveniently represented by single variables,  $x$  and  $y$  for agents 1 and 2, respectively. Such games have three Nash equilibria: two pure at  $x = y = 1$  and  $x = y = 0$ , with payoffs  $a$  and  $d$ , respectively, for both players, as well as one fully mixed at:

$$x^* = y^* = \frac{d - c}{a - b + d - c}, \quad (11)$$

with payoff  $(x^*)^2 a + x^*(1 - x^*)(b + c) + (1 - x^*)^2 d$  for both players. Recall that, by definition, the Nash equilibrium  $x = y = 0$  is always *payoff-dominant*—due to the possible re-indexing of the actions—and it is *risk-dominant* if  $d - c > a - b$ .

**Lemma B.1.** Any  $2 \times 2$  symmetric PRPG,  $\Gamma$ , with payoff functions  $u_1(s_1, s_2) = u_2(s_2, s_1) = B_{s_1, s_2}$ , where the payoff matrix  $B \in \mathbb{R}^{2 \times 2}$  is as in equation 9, can be equivalently represented by a game  $\Gamma_{w,\beta}$ . The game  $\Gamma_{w,\beta}$  has the same NE as the original game, retains the payoff- and risk-dominance properties of its equilibrium points, and preserves the limiting behavior of any QRD.

*Proof.* We begin by presenting the equations of motion of the  $q$ -replicator dynamics as functions of  $x$  and  $y$ . For the first agent that is:

$$\begin{aligned} \dot{x} &= x^q \left( u_1(a_1, y) - \frac{x^q u_1(a_1, y) + (1 - x)^q u_1(a_2, y)}{x^q + (1 - x)^q} \right) \\ &= \frac{x^q(1 - x)^q}{x^q + (1 - x)^q} (u_1(a_1, y) - u_1(a_2, y)) \\ &= \frac{x^q(1 - x)^q}{x^q + (1 - x)^q} (ay + c(1 - y) - by - d(1 - y)) \\ &= \frac{x^q(1 - x)^q}{x^q + (1 - x)^q} [(a - b + d - c)y - (d - c)] \\ &= \frac{x^q(1 - x)^q}{x^q + (1 - x)^q} \kappa \cdot (y - y^*), \end{aligned} \quad (12)$$

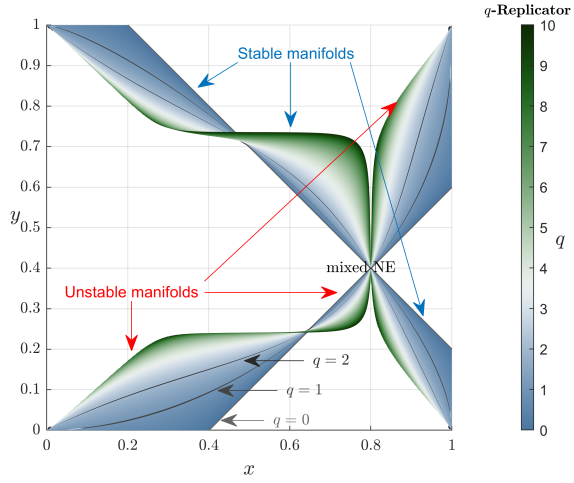

Figure 9: Stable and unstable manifolds for all  $q \in [0, 10]$  in an instance of the identical interest game  $ID_{w,\beta}$  with  $w = 2$  and  $\beta = -2$ . The unique mixed NE is not symmetric and lies at  $x^* = 0.8$ , while  $y^* = 0.4$ . The main difference with the symmetric games in  $\Gamma_{w,\beta}$  is that the regions of attraction of the payoff-dominant equilibrium (bottom-left corner) are not increasing (nor decreasing) in  $q$  anymore.

where  $\kappa := a - b + d - c$ . Similarly, we may derive the equation of motions for the second agent as  $\dot{y} = \frac{y^q(1-y)^q}{y^q + (1-y)^q} \kappa \cdot (x - x^*)$ . Here,  $(x^*, y^*)$  is the mixed Nash equilibrium of the game as given in equation 11, and holds  $y^* = x^*$ . Thus, apart from the variables  $x$  and  $y$  and the hyperparameter  $q$  which is exogenously given, the  $q$ -replicator dynamics depend on the payoffs of the game  $\Gamma$  only through  $\kappa$  and  $x^* = \frac{d-b}{\kappa}$ . It follows that any transformation that preserves the value of  $x^*$  and scales  $\kappa$  by a constant may only scale  $\dot{x}$  and  $\dot{y}$  by the same constant; that is, may only affect the convergence rate of the dynamics, but *not* their limiting behavior. Starting from an arbitrary payoff matrix  $B$  as given in equation 9 let us assume, without any loss of the generality, that the conditions in equation 10 apply. Notice that, since by the aforementioned assumptions we have that  $d > c$ , we may set some  $\delta \in \mathbb{R}$  such that  $0 < a + \delta < d - c$ . Accordingly, we consider the following sequence of transformations: (T1) Add  $\delta$  to the first column, (T2) subtract  $c$  from the second column, and (T3) divide by  $a + \delta$ . These lead to:

$$B = \begin{pmatrix} a & c \\ b & d \end{pmatrix} \xrightarrow{(T1)} \begin{pmatrix} a + \delta & c \\ b + \delta & d \end{pmatrix} \xrightarrow{(T2)} \begin{pmatrix} a + \delta & 0 \\ b + \delta & d - c \end{pmatrix} \xrightarrow{(T3)} \begin{pmatrix} 1 & 0 \\ \frac{b + \delta}{a + \delta} & \frac{d - c}{a + \delta} \end{pmatrix} =: A_{\frac{d-c}{a+\delta}, \frac{b+\delta}{a+\delta}}.$$

Notice that  $A_{\frac{d-c}{a+\delta}, \frac{b+\delta}{a+\delta}}$  is the payoff matrix of a parametric game  $\Gamma_{w,\beta}$ , where  $w := \frac{d-c}{a+\delta}$  and  $\beta := \frac{b+\delta}{a+\delta}$ . Observe, that (T1), (T2) and (T3) leave  $x^*$  unaltered and only scale  $\kappa$  by a constant  $\frac{1}{a+\delta}$ ; that is, the limiting behavior of the  $q$ -replicator dynamics is preserved. Furthermore, the risk-dominance of the equilibrium points is preserved, because:

$$d - c > a - b \quad \text{if and only if} \quad \frac{d - c}{a + \delta} > 1 - \frac{b + \delta}{a + \delta}$$

Finally, the payoff-dominance of the Nash equilibrium  $x = y = 0$  is also preserved because, by the definition of  $\delta$ , we have that  $\frac{d-c}{a+\delta} > 1$ .  $\square$

Next, we are going to construct the invariant functions of  $\Gamma_{w,\beta}$  with respect to the  $q$ -replicator dynamics, which are given by Lemma 4.5 that we restate below for completeness. Recall that  $(\alpha, \alpha)$  is defined to be the equilibrium point of the a game  $\Gamma_{w,\beta}$ ; that is,  $x^* = y^* = \alpha$ .

**Lemma 4.5** (Invariant functions of QRD in  $2 \times 2$  symmetric PRPGs). *Given a  $2 \times 2$  symmetric PRPG,  $\Gamma_{w,\beta}$ , whose agents evolve with respect to the  $q$ -replicator dynamics, the separable function  $\Psi_q : (0, 1)^2 \rightarrow \mathbb{R}$  with  $\Psi_q(x, y) := \psi_q(x) - \psi_q(y)$ , where  $\psi_q : (0, 1) \rightarrow \mathbb{R}$  is given by:*

$$\psi_q(x) = \begin{cases} \frac{x^{2-q} + (1-x)^{2-q} - 1}{2-q} + \frac{1 - \alpha x^{1-q} - (1-\alpha)(1-x)^{1-q}}{1-q}, & q \neq 1, 2, \\ \alpha \ln(x) + (1-\alpha) \ln(1-x), & q = 1, \\ \ln(x) + \ln(1-x) + \frac{\alpha}{x} + \frac{1-\alpha}{1-x}, & q = 2, \end{cases} \quad (6)$$

*remains constant along any trajectory  $\{x(t), y(t)\}_{t \geq 0}$  of the system. The function  $\Psi_q(x)$  is continuous with respect to the parameter  $q$  at, both,  $q = 1$  and  $q = 2$ , since  $\lim_{q \rightarrow 1} \Psi_q(x) = \Psi_1(x)$  and  $\lim_{q \rightarrow 2} \Psi_q(x) = \Psi_2(x)$  for all  $x \in (0, 1)$ .*

*Proof.* To prove the statement, we will show that the time derivative of  $\Psi_q(x(t), y(t))$  is equal to zero. Let us begin by constructing the derivative of  $\psi(x)$ . For  $q \neq 1, 2$  we have that:

$$\psi'_q(x) = \frac{x}{x^q} - \frac{1-x}{(1-x)^q} - \frac{\alpha}{x^q} + \frac{1-\alpha}{(1-x)^q} = \frac{x-\alpha}{x^q} + \frac{x-\alpha}{(1-x)^q} = \frac{(x-\alpha)[(1-x)^q + x^q]}{x^q(1-x)^q}.$$

Similarly, for  $q = 1$  we have that:

$$\psi'_1(x) = \frac{\alpha}{x} - \frac{1-\alpha}{1-x} = \frac{\alpha-x}{x(1-x)},$$

and, for  $q = 2$ , we have that:

$$\psi'_2(x) = \frac{1}{x} - \frac{1}{1-x} - \frac{\alpha}{x^2} + \frac{1-\alpha}{(1-x)^2} = \frac{(x-\alpha)[x^2 + (1-x)^2]}{x^2(1-x)^2}.$$

That is the derivative of  $\psi(x)$  has the general form:

$$\psi'_q(x) = \lambda \cdot \frac{(x - \alpha)[(1 - x)^q + x^q]}{x^q(1 - x)^q},$$

for all  $q \geq 0$ , where  $\lambda \in \{1, -1\}$ . Notice, that the choice for  $\lambda$  is purely stylistic because the invariance of a function is not affected by scalar transformations. Using equation 12 from the proof of Lemma B.1 we have that:

$$\begin{aligned} \dot{\Psi}_q(x, y) &= \frac{\partial \Psi_q(x, y)}{\partial x} \dot{x} - \frac{\partial \Psi_q(x, y)}{\partial y} \dot{y} \\ &= \psi'_q(x) \dot{x} - \psi'_q(y) \dot{y} \\ &= \lambda \cdot \kappa \cdot [(x - \alpha)(y - \alpha) - (y - \alpha)(x - \alpha)] = 0 \end{aligned}$$

□

Before we proceed with the proof of the main theorem of this section (Theorem 4.4), we need to provide the formal definition of the stable and unstable manifolds of the mixed NE of  $\Gamma_{w,\beta}$ .

**Definition B.2** (Stable and unstable manifolds of  $\Gamma_{w,\beta}$  under QRD). *Let  $\Psi_q : [0, 1]^2 \rightarrow \mathbb{R}$  with  $\Psi_q(x, y) = \Psi_{q,\text{Stable}}(x, y) \cdot (x - y)$  for all  $x, y \in [0, 1]$  denote the invariant function of the  $q$ -replicator dynamics for the  $2 \times 2$  symmetric PRPG,  $\Gamma_{w,\beta}$ . The unstable manifold of the mixed NE  $(x, y) = (\alpha, \alpha)$  under the  $q$ -replicator dynamics is the curve  $\mathcal{M}_{\text{Unstable}} := \{(x, y) \in (0, 1)^2 \mid x = y\}$ ; that is, the set of points for which  $\lim_{t \rightarrow -\infty} x(t) = \lim_{t \rightarrow -\infty} y(t) = \alpha$ . Analogously, the stable manifold of the mixed NE is the curve  $\mathcal{M}_{\text{Stable}} := \{(x, y) \in (0, 1)^2 \mid \Psi_{q,\text{Stable}}(x, y) = 0\}$ ; that is, the set of points for which  $\lim_{t \rightarrow \infty} x(t) = \lim_{t \rightarrow \infty} y(t) = \alpha$ .*

For the rest of this section, we are going need to have at hand an explicit form of the stable manifold  $\mathcal{M}_{\text{Stable}}$  of the mixed NE of  $\Gamma_{w,\beta}$  with respect to the 0-replicator dynamics, or GD. In that regard, we now going to construct that manifold. Recall that from equation 4.5 the invariant function of any QRD in  $\Gamma_{w,\beta}$  is given by  $\Psi_0(x, y) := \psi_0(x) - \psi_0(y) = 0$ , where:

$$\psi_0(x) = \frac{x^2 + (1 - x)^2 - 1}{2} + 1 - \alpha x - (1 - \alpha)(1 - x) = x^2 - 2\alpha x + \alpha.$$

Therefore,  $\Psi_0(x, y) = x^2 - 2\alpha x + \alpha - y^2 - 2\alpha y + \alpha = (x - y)(x + y - 2\alpha) = 0$  and the stable manifold (cf. subsection 4.2) satisfies  $\Psi_{q,\text{Stable}}(x, y) = x + y - 2\alpha = 0$ . In other words, the stable manifold is the line segment:

$$\mathcal{M}_{\text{Stable}} = \{(x, y) \in (0, 1)^2 \mid y = 2\alpha - x\}. \quad (13)$$

Now, let us proceed with the proof of the main theorem.

**Theorem 4.4** (Performance of QRD in symmetric  $2 \times 2$  PRPG). *Given any  $2 \times 2$  symmetric PRPG, which, without any loss of generality, can be represented as an instance  $\Gamma_{w,\beta}$ , it holds that*

$$APM_{\text{SW,int}} \mathcal{X}(V_0, \Gamma_{w,\beta}) \geq APM_{\text{SW,int}} \mathcal{X}(V_1, \Gamma_{w,\beta}) \quad (5)$$

*if and only if whenever the payoff-dominant equilibrium is also risk-dominant, with equality only when if-and-only-if  $\alpha = 0.5$ , i.e.,  $w = 1 - \beta$ , where  $V_0, V_1$  are the equations of motion of the 0-replicator and 1-replicator dynamics, respectively equation QRD.*

*Proof.* Let us first recall that, by equation 13 and Definition B.2, the stable and unstable manifolds of gradient descent (GD) is given by the lines  $y = 2\alpha - x$  and  $y = x$ , respectively, where  $\alpha = \frac{w}{w+1-\beta}$ , while the stable and unstable manifolds of the standard replicator dynamics are given as solutions to:

$$\Psi_1(x, y) = \psi_1(x) - \psi_1(y) = \alpha \ln \left( \frac{x}{y} \right) + (1 - \alpha) \ln \left( \frac{1 - x}{1 - y} \right) = 0,$$

where the line  $y = x$  corresponds to a solution. We are going to prove that the *single* remaining solution of the previous equation, although it cannot be expressed explicitly, satisfies  $y \leq 2\alpha - x$ , if



$\alpha > \frac{1}{2}$ ,  $y \geq 2\alpha - x$ , if  $\alpha < \frac{1}{2}$  (with equality in both cases only if  $x = \alpha$ ), and  $y = 2\alpha - x$  otherwise; hence, the statements of Theorem 4.4 follow naturally.

It is not difficult to show that  $\psi'_1(x) = \frac{\alpha-x}{x(1-x)}$  (cf. proof of Lemma 4.5), and  $\psi''_1(x) = -\frac{x^2-2\alpha x+\alpha}{x^2(1-x)^2} < 0$ . Therefore,  $\psi_1$  is a strictly concave function with maximum at  $x = \alpha$ . To proceed, it will be useful to define the implicit function  $y : (0, 1) \rightarrow (0, 1)$  such that  $y(\alpha) = \alpha$ , and  $\forall x \in (0, 1) \setminus \{\alpha\}$ :  $y(x) \neq \alpha$ , and  $\psi_1(y(x)) = \psi_1(x)$ . By applying the Intermediate Value Theorem (IVT) on  $\psi_1$  in the intervals  $(0, \alpha)$ , and  $(\alpha, 1)$ , we can verify that  $y$  is a well-defined bijective function. Note that  $y = y(x)$  has to correspond to the remaining solution of  $\Psi_1(x, y)$ .

Without any loss of the generality, let us consider the case of  $\alpha > \frac{1}{2}$ . Since  $\psi'_1$  is strictly decreasing in  $(0, 1)$  ( $\psi''_1 < 0$ ), we have that  $\psi'_1(x) > 0$  for all  $x \in (0, \alpha)$ , and  $\psi'_1(x) < 0$  for all  $x \in (\alpha, 1)$ . We begin by proving that for all  $x \in (0, 1 - \alpha)$  it holds that  $|\psi'_1(\alpha - x)| < |\psi'_1(\alpha + x)|$ , i.e.,  $\psi'_1(\alpha - x) < -\psi'_1(\alpha + x)$ . Specifically, we have the following series of equivalences:

$$\begin{aligned} \psi'_1(\alpha - x) < -\psi'_1(\alpha + x) &\iff \frac{x}{(\alpha - x)(1 - \alpha + x)} < \frac{x}{(\alpha - x)(1 - \alpha - x)} \\ &\iff x(\alpha - x)(1 - \alpha - x) < x(\alpha - x)(1 - \alpha + x) \\ &\iff 2x^2(1 - 2\alpha) < 0 \\ &\iff \alpha > \frac{1}{2}, \end{aligned}$$

which holds by assumption. Next, by taking advantage of the above, we can prove that, for all  $x \in (0, 1 - \alpha)$ , it holds  $\psi_1(\alpha - x) > \psi_1(\alpha + x)$ ; that is:

$$\begin{aligned} \psi_1(\alpha - x) &= \int_0^{\alpha-x} \psi'_1(t) dt \\ &= \int_0^{\alpha} \psi'_1(t) dt + \int_{\alpha-x}^{\alpha} -\psi'_1(t) dt \\ &> \int_0^{\alpha} \psi'_1(t) dt + \int_{\alpha}^{\alpha+x} \psi'_1(t) dt \\ &= \psi_1(\alpha + x) \end{aligned}$$

Furthermore, since  $\psi_1$  is monotonically decreasing in  $(\alpha, 1)$  ( $\psi'_1 < 0$  in  $(\alpha, 1)$ ), we have that, for all  $x \in (0, 1 - \alpha)$ , and for all  $t \in [\alpha + x, 1)$ , it holds  $\psi_1(\alpha - x) > \psi_1(t)$ . However, by the IVT, we have that there exists  $t^* \in (\alpha, 1)$  such that  $\psi_1(\alpha - x) = \psi_1(t^*)$ . Therefore, it must hold that  $t^* \in (\alpha, \alpha + x)$ . Then, since  $y$  is a bijective, we have that  $y(\alpha - x) = t^* < \alpha + x$ , i.e., for all  $x \in (2\alpha - 1, \alpha)$  we have that  $y(x) < 2\alpha - x$ . Similarly, we have that  $y(\alpha + x) < \alpha - x$ , i.e., for all  $x \in (\alpha, 1)$ , it holds that  $y(x) < 2\alpha - x$ . Finally, notice that for all  $x \in (0, 2\alpha - 1)$ , we trivially have that  $2\alpha - x > 1 > y(x)$ ; therefore, for all  $x \in (0, 1) \setminus \{\alpha\}$ :  $y(x) < 2\alpha - x$ . We remark that the case of  $\alpha < \frac{1}{2}$  follows identical arguments, while the case  $\alpha = \frac{1}{2}$  is trivial.  $\square$

Technically, a direct implication of the proof of Theorem 4.4 is provided in Lemma B.3 which may be of independent interest. Recall from the proof of Theorem 4.4 that the solutions to  $\Psi_1(x, y) = 0$  are the functions  $y = x$  and  $y : (0, 1) \rightarrow (0, 1)$  such that  $y(\alpha) = \alpha$ , and for all  $x \in (0, 1) \setminus \{\alpha\}$  it holds that  $y(x) \neq \alpha$ , and  $\psi_1(y(x)) = \psi_1(x)$ .

**Lemma B.3** (Curvature of the stable manifold of RD). *Consider the 1-replicator dynamics (RD) in the parametric game  $\Gamma_{w,\beta}$ . The stable manifold,  $\mathcal{M}_{\text{Stable}}$  of RD in  $\Gamma_{w,\beta}$  is given by the curve  $y = y(x)$ . If the payoff-dominant equilibrium,  $x = y = 0$ , is also risk-dominant, then  $y$  is strictly concave. Conversely, if the non-payoff dominant equilibrium,  $x = y = 1$ , is risk-dominant, then  $y$  is strictly convex. Otherwise,  $y(x) = 1 - x$ .*

*Proof.* By differentiating both sides of the implicit function  $\psi_1(y(x)) = \psi_1(x)$  with respect to  $x$ , we get that  $\psi'_1(y(x))y'(x) = \psi'_1(x)$ , i.e.,  $y'(x) = \frac{\psi'_1(x)}{\psi'_1(y(x))}$ . Notice that, since  $y$  is bijective,  $\psi'_1$  is monotonic ( $\psi''_1 < 0$ ), and  $\psi'_1(y(\alpha)) = \psi'_1(\alpha) = 0$ , the above equality is well-defined for all

$x \in (0, 1) \setminus \{\alpha\}$ . Hence, we have that:

$$\begin{aligned} y'' &= \frac{\psi_1''(x)[\psi_1'(y)]^2 - \psi_1'(x)\psi_1''(y)y'}{[\psi_1'(y)]^2} \\ &= \frac{\psi_1''(x)[\psi_1'(y)]^2 - [\psi_1'(x)]^2\psi_1''(y)}{[\psi_1'(y)]^3} \\ &= \frac{y^3(1-y)^3\alpha(1-\alpha)(x-y)(y+x-2\alpha)}{(\alpha-y)^3x^2(1-x)^2y^2(1-y)^2}, \end{aligned}$$

where the dependency of  $y$  to  $x$  is implied for compactness. Hence, we have that  $y''(x) < 0$  if and only if  $\frac{(x-y)(y+x-2\alpha)}{\alpha-y} < 0$ . However, by the Intermediate Value Theorem (IVT) applied on  $\psi_1$  in  $(0, \alpha)$ , and  $(\alpha, 1)$ , and the definition of  $y$ , it follows, trivially, that  $x \leq y$  if, and only if,  $\alpha \leq y$ , with equality in both inequalities only if  $x = \alpha$ . Therefore,  $\frac{x-y}{\alpha-y} > 0$ ,  $\forall x \in (0, 1) \setminus \{\alpha\}$ ; hence  $y''(x) < 0$  if, and only if,  $y + x - 2\alpha < 0$ , which by the proof of Theorem 4.4 is equivalent to  $\alpha > \frac{1}{2}$ . This concludes the proof for the first statement. The second statement follows in a similar manner by requesting  $y''(x) > 0$ , while the last statement is trivial.  $\square$

**Application: APoA in  $2 \times 2$  PRPGs.** We conclude this section by providing the proof of Theorem 4.6, which we restate below for convenience. Recall that from this point forward, we focus on symmetric  $2 \times 2$  PRPGs such that payoff- and risk-dominant equilibria coincide, as in such settings, one can prove particularly strong, tight bounds on APoA. This showcases the practical importance of Theorem 4.4 and the invariant function approach.

**Theorem 4.6.** *The APoA of GD dynamics in all  $2 \times 2$  symmetric PRPGs,  $\Gamma_{w,\beta}$ , is bounded by 2, i.e.,  $\text{APoA}(V_0, \Gamma_{w,\beta}) \leq 2$ . Furthermore, this bound is tight.*

*Proof.* Let  $\Gamma_{w,\beta}$  be a  $2 \times 2$  symmetric PRPG, where the payoff-dominant equilibrium,  $x = y = 0$ , is also risk-dominant, i.e.,  $\beta > 1 - w$ , or equivalently  $\alpha > 0.5$ , where  $x^* = y^* = \alpha$  is the mixed NE of  $\Gamma_{w,\beta}$ . Recall that, by equation 13, the stable manifold of the mixed NE of  $\Gamma_{w,\beta}$  with respect to GD is the line segment:

$$\ell : y = 2\alpha - x \quad \text{for } x \in (\max\{0, 2\alpha - 1\}, \min\{2\alpha, 1\}).$$

Since  $\alpha > 0.5$ , we have that  $2\alpha - 1 \geq 0$  and  $2\alpha \geq 1$ ; therefore, the extreme points of  $\ell$  are  $(0, 2\alpha)$  and  $(2\alpha, 0)$ . That implies the the RoA of  $(1, 1)$  is the triangle with extreme points at  $(1, 1)$ ,  $(2\alpha - 1, 1)$ , and  $(1, 2\alpha - 1)$ . Since that is a right triangle, with both its base and its height equal to  $2(1 - \alpha)$ , the Lebesgue measure of  $\text{RoA}(0, 0)$  is  $\mu(\text{RoA}(1, 1)) = 2(1 - \alpha)^2$ ; subsequently,  $\mu(\text{RoA}(0, )) = 1 - \mu(\text{RoA}(1, 1)) = 1 - 2(1 - \alpha)^2$ . We may calculate the APoA of GD in  $\Gamma_{w,\beta}$  as a function of  $w$  and  $\beta$ . Specifically, when  $\alpha > 0.5$ , i.e.,  $\beta < 1 - w$ , we have that:

$$\begin{aligned} \text{APoA}(w, \beta) &:= \text{APoA}(\text{GD}, \Gamma_{w,\beta}) \\ &= \frac{\max_{x,y \in [0,1]} \text{SW}(x, y)}{\text{APM}_{\text{SW}, [0,1]^2}(\text{GD}, \Gamma_{w,\beta})} \\ &= \frac{\text{SW}(0, 0)}{\text{SW}(0, 0) \cdot \mu(\text{RoA}(0, 0)) + \text{SW}(1, 1) \cdot \mu(\text{RoA}(1, 1))} \\ &= \frac{w}{w\mu(\text{RoA}(0, 0)) + \mu(\text{RoA}(1, 1))} \\ &= \frac{w}{w[1 - 2(1 - \alpha)^2] + 2(1 - \alpha)^2} \\ &= \frac{w}{w \left[ 1 - 2 \left( \frac{1-\beta}{w+1-\beta} \right)^2 \right] + 2 \left( \frac{1-\beta}{w+1-\beta} \right)^2} \\ &= \frac{w(w+1-\beta)^2}{w(w+1-\beta)^2 - 2(w-1)(1-\beta)^2}. \end{aligned}$$

We may, now, perform a first-order analysis in  $\text{APoA}(w, \beta)$ ; that is, for all  $\beta \geq 1 - w$ , we have that:

$$\frac{\partial \text{APoA}(w, \beta)}{\partial \beta} = \frac{-4w^2(w-1)(w+1-\beta)(1-\beta)}{[w(w+1-\beta)^2 - 2(w-1)(1-\beta)^2]^2} \leq 0.$$

From the above, it follows that  $\text{APoA}(w, \beta) \leq \text{APoA}(w, 1 - w)$ ; that is:

$$\text{APoA}(w, \beta) \leq \frac{4w^3}{4w^3 - 2(w-1)w^2} = \frac{2w^3}{w^3 + w^2} < 2,$$

where the last inequality follows by letting  $w \rightarrow \infty$ . Notice that this bound is tight. It is not difficult to see that if  $\alpha < 0.5$ ,  $\text{APoA}(w, \beta)$  is unbounded.  $\square$

## C NUMERICAL EXPERIMENTS BEYOND $2 \times 2$ PRPGs

In this part, we present results from simulations of the  $q$ -replicator dynamics in PRPGs of higher dimensions, i.e., beyond the  $2 \times 2$  setting. The purpose of the current simulations is twofold. First, we want to test whether the theoretical prediction of Theorem 4.4 extends to larger 2-agent, symmetric games (games in which each of the 2 agents has more than two actions), i.e., whether gradient descent dynamics have better/worse average performance than the standard replicator dynamics when payoff-dominance and risk-dominance coincide/differ. Second, we want to test the theoretical prediction of Theorem 4.6, i.e., whether the Average Price of Anarchy (APoA) remains bounded by 2 (or if not, whether it changes according to some pattern that depends on the size of the input) in larger 2-agent, symmetric PRPGs in which payoff-dominance and risk-dominance coincide.

Recall that Theorem 3.2, i.e., pointwise convergence of QRD to NEs, holds for *arbitrary* PRPGs which means that such experiments are possible (and meaningful) in the first place. However, the *game-theoretic* interpretation of the results may not be as straightforward in larger dimensions as it was in the  $2 \times 2$  case. The reason is that the notion of risk-dominance does not admit a straightforward rigorous generalization to arbitrary games. However, in the most natural class of games in which equilibrium selection is typically studied, risk-dominance can still be defined in an intuitive way Leonardos & Piliouras (2022). This is the class of *diagonal games* and their perturbations. A 2-agent, symmetric, diagonal game can be described by a payoff matrix,  $U$ , that has non-zero (and in our case, non-negative) elements only on the diagonal, i.e., it is of the form,

$$U = \begin{pmatrix} u_1 & 0 & \dots & 0 \\ 0 & u_2 & \dots & 0 \\ \vdots & \vdots & \ddots & \vdots \\ 0 & 0 & \dots & u_n \end{pmatrix} := \text{diag}(u_1, u_2, \dots, u_n)$$

with  $0 < u_1 < u_2 < \dots < u_n$ . In these games,  $u_n$  is the payoff of the payoff-dominant equilibrium for each player. Any failure to coordinate at a pure equilibrium (point on the diagonal) results in a payoff of zero. Thus, all (pure) equilibria are in a sense *equally* risky.

### C.1 EXPERIMENTAL SETUP

We run experiments in random 2-agent, symmetric diagonal PRPGs (D-PRPGs) of dimensions  $n = 2, 3, \dots, 20$  (size of each agent’s action space). In each game, the payoffs  $u_1, u_2, \dots, u_n$  are selected (pseudo-)randomly and satisfy the following properties: (i) the lowest diagonal payoff,  $u_1$ , is at least as large as some predefined positive constant (set equal to  $1e - 12$  for the experiments), (ii) the highest (diagonal) payoff,  $u_n$ , is equal to the dimension,  $n$ , of the game, i.e.,  $u_n = 2, 3, \dots$  and 20 respectively, and (iii)  $u_2, \dots, u_{n-1}$  are in ascending order strictly between  $u_1$  and  $u_n$  with randomly selected distances between them. For each dimension, we sample 100 random games and run the gradient descent and standard replicator dynamics for 1000 initial conditions till convergence.

### C.2 NUMERICAL RESULTS

The outputs of the simulations of the above experiments are summarized in Figure 10. Four instances, for  $n = 3, 5, 10$  and 20 are described for reference in Table 1.

These outputs provide indications for the following:

1. The gradient descent dynamics (continue to) outperform the replicator dynamics in all diagonal games in terms of average performance. The result holds not only for the aggregate average metrics reported in Figure 10 and Table 1, but also for each individual game that was sampled.

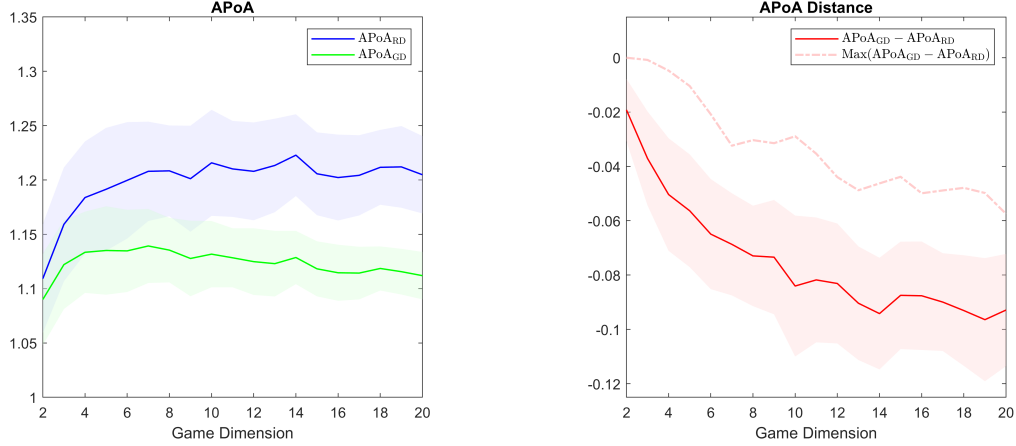

Figure 10: Numerical results regarding the APoA metric of replicator dynamics (RD) and gradient descent (GD) in diagonal PRPGs of dimensions  $n = 2, 3, \dots, 20$ . The left panel shows the APoA of each dynamic together with its standard deviation over 100 randomly sampled games at each dimension. The panel on the right shows their difference (solid line enveloped by the standard deviation shaded region) and the difference of the maximum APoA of the dynamics observed over all the 100 sampled games at each dimension. The GD dynamics throughout outperform the RD dynamics suggesting that an extension of Theorem 4.4 may be possible to larger dimensional D-PRPGs.

|          | APoA $\pm$ std    |                   | Maximum APoA |       |
|----------|-------------------|-------------------|--------------|-------|
|          | RD                | GD                | RD           | GD    |
| $n = 3$  | $1.159 \pm 0.052$ | $1.122 \pm 0.041$ | 1.234        | 1.190 |
| $n = 5$  | $1.191 \pm 0.057$ | $1.135 \pm 0.040$ | 1.300        | 1.223 |
| $n = 10$ | $1.216 \pm 0.049$ | $1.131 \pm 0.030$ | 1.377        | 1.202 |
| $n = 20$ | $1.205 \pm 0.036$ | $1.112 \pm 0.022$ | 1.284        | 1.215 |

Table 1: Numerical results regarding the APoA metric of replicator dynamics (RD) and gradient descent (GD) in diagonal PRPGs of dimension  $n = 3, 5, 10$  and  $20$ . The second column reports the average APoA and its standard deviation over 100 random diagonal games for each dimension and the last column reports the maximum APoA observed in all these instances. Note that the reported maximum APoA should only be interpreted as a rough indication of the actual maximum APoA (i.e., of the maximum APoA in the whole population of games of a specific dimension). Accurately estimating the latter requires a larger sample of games (currently equal to 100 for each dimension).

This provides evidence that the result of Theorem 4.4 may extend to larger dimensions, at least in the case of diagonal games.

2. The APoA never exceeded the theoretical bound of 2 (and in fact, it was much lower than that as the Maximum APoA column suggests) in all sampled games. This indicates that the theoretical bound of 2 for the gradient descent dynamics (cf. Theorem 4.6) possibly extends to larger dimensions as well. Moreover, this bound still holds numerically for the replicator dynamics (as was the case when  $n = 2$ ).

Summing up, the experiments in the diagonal games provide preliminary evidence that the theoretical results of Theorem 4.4 and Theorem 4.6 that were established in the case of  $2 \times 2$  games, seem to scale well also in larger dimensions. These results provide a promising starting point for the analysis of average performance measures for both larger classes of games (including arbitrary PRPGs of larger dimensions) and larger classes of dynamics (with arbitrary regularizers) and, intriguingly, suggest that our rigorous guarantees in low-dimensional games may admit similar counterparts even in higher/arbitrary dimensional games, at least of certain structure.

**On Risk-dominance in Higher Dimensions** In diagonal games (D-PRPGs), it is straightforward to make an equilibrium more *risky*. This is achieved simply by replacing the zero entries in the corresponding line of matrix  $U$  by some negative number, e.g.,

$$U_{\text{risky},n} = \begin{pmatrix} u_1 & 0 & \dots & 0 \\ 0 & u_2 & \dots & 0 \\ \vdots & \vdots & \ddots & \vdots \\ -10 & -10 & \dots & u_n \end{pmatrix} := \text{diag}(u_1, u_2, \dots, u_n; \text{risk}_n = -10)$$

In this case, the payoff-dominant equilibrium with payoff  $u_n$  to each player becomes more risky, since a failure to coordinate on it results to a negative payoff of  $-10$  for the agent who selected the corresponding action. Proceeding in a similar fashion, one may replace the zero entries with an (arbitrarily large) negative element in all lines of the matrix except for the first one. In analogy to the  $U_{\text{risky},n}$  notation, we will denote such games by  $U_{\text{risky}} := \text{diag}(u_1, u_2, \dots, u_n; \text{risk} = -r)$ , where  $r > 0$  is the *risk constant* (equal to  $-10$  in the example above). In this way, all equilibria become more risky except for the payoff-dominated one, i.e., the equilibrium with payoffs  $u_1$  to each agent which corresponds to the action profile in which every agent selects their first action.<sup>6</sup>

Concerning our experiments, the outcome of Figure 10 (see also Table 1) is reversed in games of the form  $U_{\text{risk}}$ , i.e., in games in which the payoff superior equilibria were more risky (not reported here).

<sup>6</sup>An alternative interesting approach to generalize the notion of risk-dominance in arbitrary games is via pairwise comparisons of actions as proposed by Honda (2012).
